# Supplementary material for: Organic carbon rich sediments: benthic foraminifera as bio-indicators of depositional environments
Source: Copernicus journal article supplement (doi:10.5194/bg-2019-125), 2019-05-20
Supplement: Supplementary file [file bg-2019-125-AC2-supplement.pdf]

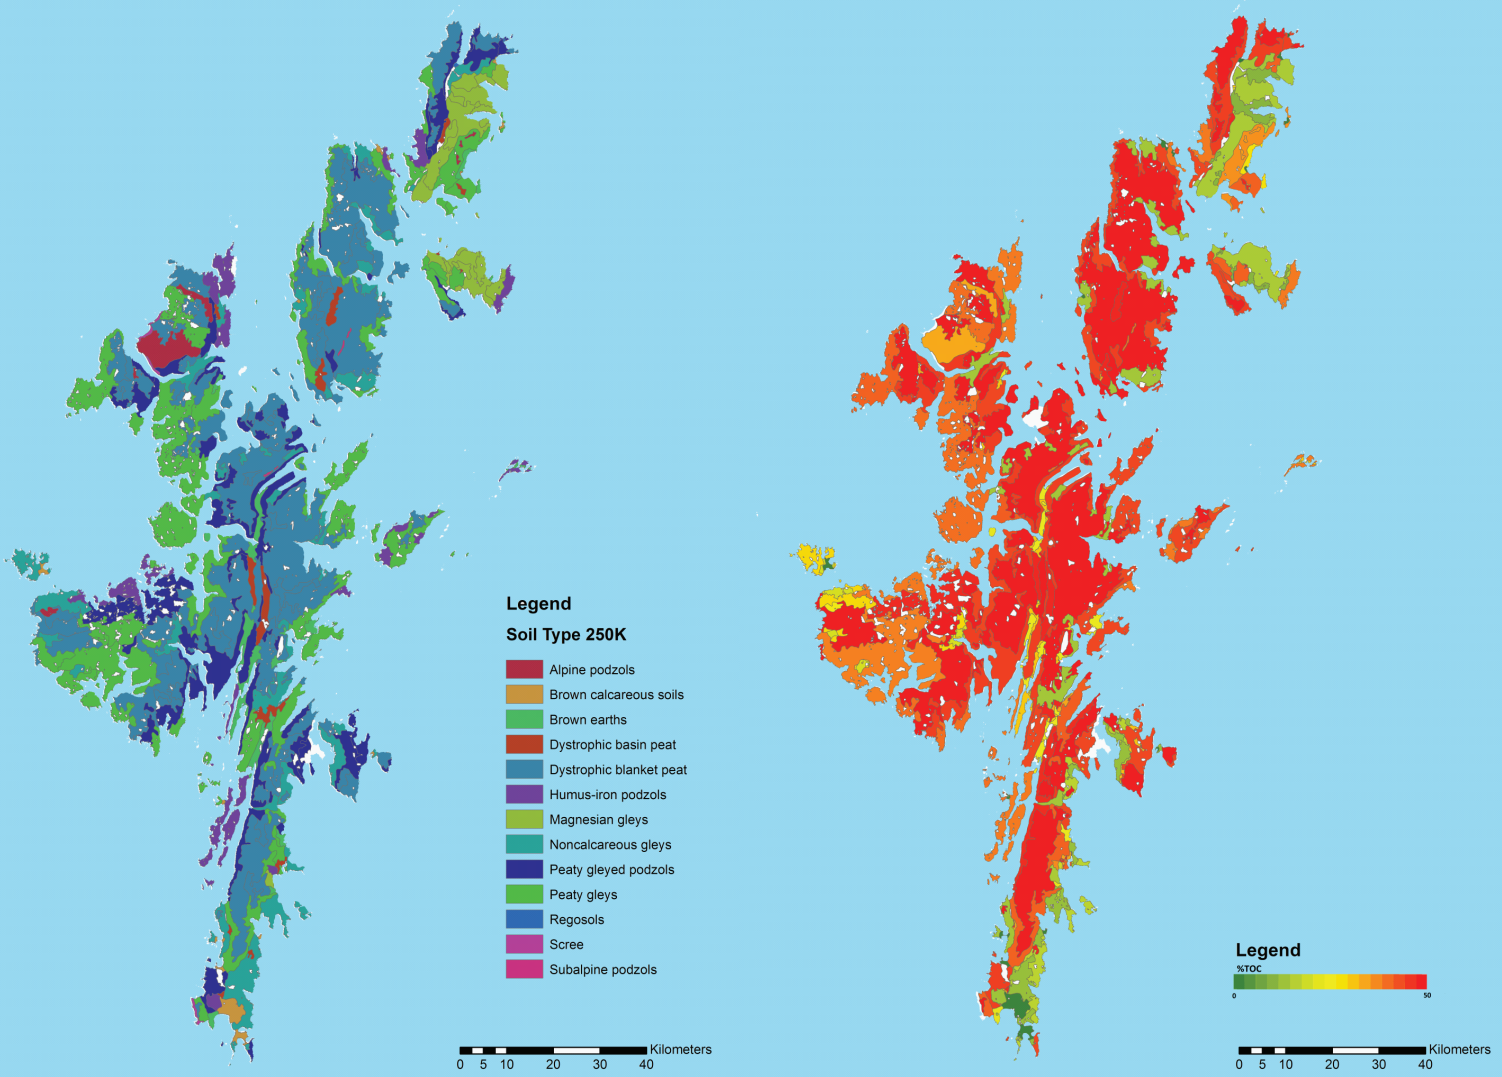

Supplementary Fig. 1

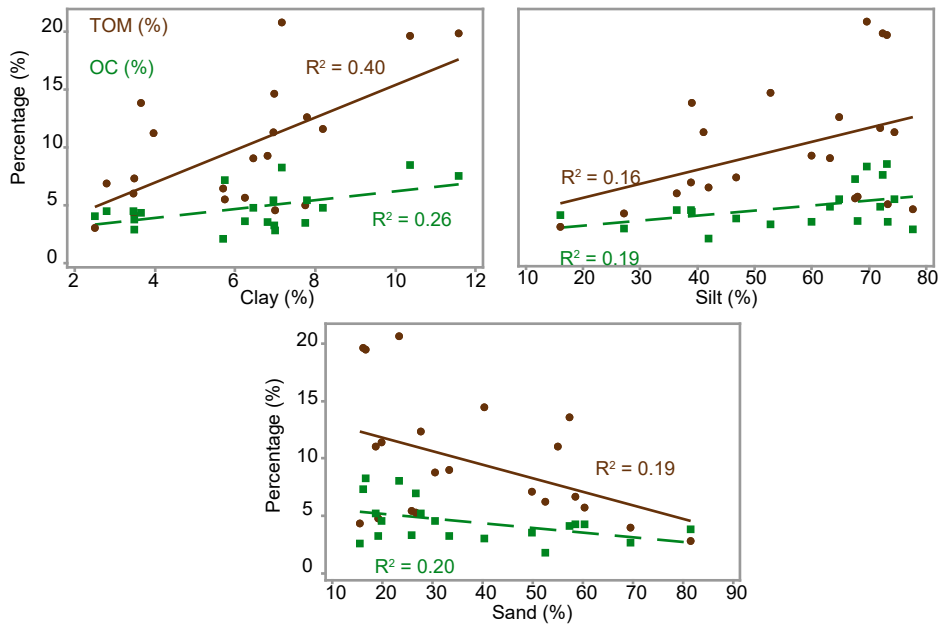

Supplementary Fig. 3

**Supplementary Figure 1. Shetland soil maps.** Map on the left shows soil types in Shetland, map on the right illustrates TOC content in Shetland's soils.

**Supplementary Figure 2. SEM micrographs of benthic foraminifera in six voes on Shetland's west coast; scale bar = 100 µm; identification after Austin (1991) and references therein.** 1 *Ammonia batavus*. 2 *Ammonia* sp. 3 *Ammoscalaria runiana*. 4 *Bolivina pseudoplicata*. 5 *Bolivina skagerrakensis*. 6 *Bolivinellina pseudopunctata*. 7 *Buccella frigida*. 8 *Buccella tenerrima*. 9 *Bulimina elongata*. 10 *Bulimina marginata*. 11 *Buliminella elegantissima*. 12 *Cassidulina laevigata*. 13 *Cassidulina obtusa*. 14 *Cibicides lobatulus*. 15 *C. lobatulus*. deformed. 16 *Connemarella rudis*. 17 *Discanomalina* sp. 18 *Eggerelloides scaber*. 19 *Elphidium aculeatum*. 20 *Elphidium albiumbelicatum*. 21 *Elphidium crispum*. 22 *Elphidium excavatum* (subsp *clavatum*). 23 *Elphidium excavatum* (subsp *selseyense*). 24 *Elphidium gerthi*. 25 *Elphidium incertum*. 26 *Elphidium margaritaceum*. 27 *Elphidium* sp. 28 *Elphidium williamsoni*. 29 *Epistominella vitrea* (*Eilohedra vitrea*). 30 *Oolina hexagona* (*Favulina hexagona*). 31 *Oolina melo* (*Favulina melo*). 32 *Fissurina* sp. 33 *Haplophragmoides* sp. 34 *Haynesina germanica*. 35 *Hyalina balthica*. 36 *Glandulina* sp. 37 *Lagena setigera*. 38 *Lagena* sp. 39 *Lagena striata*. 40 *Miliolinella subrotunda*. 41 *Nonion* sp. 42 *Nonion* sp. 43 *Nonionoides turgidus*. 44 *Oolina williamsoni* (*Homalohedra williamsoni*). 45 *Patellina corrugata*. 46 *Planorbulina distoma*. 47 *Quinqueloculina bicornis* (*Adelosina bicornis*). 48 *Quinqueloculina seminula*. 49 *Reophax fusiformis*. 50 *Quinqueloculina* sp. 51 *Rosalina anomala*. 52 *Rosalina* sp. 53 *Spirillina vivipara*. 54 *Spiroloculina rotunda*. 55 *Spiroplectinella wrightii*. 56 *Stainforthia fusiformis*. 57 *Subanomalina pauperata*. 58 *Textularia earlandi*. 59 *Trochammina* sp. 60 Indetermined. 61 Indetermined. 62 Indetermined. 63 Indetermined. 64 Etched *Ammonia* sp.

**Supplementary Figure 3.** Trends between particle size and organic matter and carbon content.
